1 The association of human astrovirus with extracellular vesicles facilitates cell  
2 infection and protects the virus from neutralizing antibodies

3

4 Baez-N, Carlos<sup>a</sup>, Iván R. Quevedo<sup>b</sup>, Susana López<sup>a</sup>, Carlos F. Arias<sup>a</sup>, Pavel Iša<sup>a#</sup>

5

6 <sup>a</sup> Departamento de Genética del Desarrollo y Fisiología Molecular, Instituto de  
7 Biotecnología, Universidad Nacional Autónoma de México, Cuernavaca, Morelos,  
8 Mexico

9 <sup>b</sup> Departamento de Ingeniería Química, Industrial y de Alimentos, Universidad  
10 Iberoamericana, Ciudad de México, México

11

12 Running title: Human astrovirus associates with extracellular vesicles.

13

14

15 #Address correspondence to: Pavel Iša, [pavel.isa@ibt.unam.mx](mailto:pavel.isa@ibt.unam.mx)

16

17

18 Keywords.

19 Astrovirus, extracellular vesicles, vesicle mediated infection,

20

21 **Abstract**

22       Viral gastroenteritis has a global distribution and represents a high risk for  
23 vulnerable population and children under 5 years because of acute diarrhea, fever  
24 and dehydration. Human astroviruses (HAstV) have been identified as the third most  
25 important cause of viral gastroenteritis in pediatric and immunocompromised  
26 patients. Furthermore, HAstV has been reported in biopsies taken from patients with  
27 encephalitis, meningitis and acute respiratory infection, yet it is not clear how the  
28 virus reaches these organs. In this work we tested the possibility that the released  
29 astrovirus particles could be associated with extracellular vesicles. Comparison  
30 between vesicles purified from astrovirus- and mock-infected cells showed that  
31 infection with HAstV Yuc8 enhances production of vesicles larger than 150 nm.  
32 These vesicles contain CD63 and Alix, two markers of vesicular structures. Some of  
33 the extracellular virus was found associated with vesicular membranes, and this  
34 association facilitates cell infection in the absence of trypsin activation and protects  
35 virions from neutralizing antibodies. Our findings suggest a new pathway for HAstV  
36 spread and might represent an explanation for the extraintestinal presence of some  
37 astrovirus strains.

38

39 **Importance.**

40 Astroviruses are an important cause of diarrhea in children; recently some reports  
41 have found these viruses in extra-intestinal organs, including the central nervous  
42 system, causing unexpected clinical disease. In this work we found that human  
43 astrovirus strain Yuc8 associates with extracellular vesicles, possibly during or  
44 after their cell egress. The association with vesicles seems to increase astrovirus  
45 infectivity in less susceptible cells, and renders virus particles insensitive to  
46 neutralization by antibodies. These data suggest that extracellular vesicles could  
47 represent a novel pathway for astrovirus to disseminate outside the gastrointestinal  
48 tract.

49

50

51

## 52 **Introduction**

53           Astroviruses are considered the third most important cause of viral  
54 gastroenteritis in children, as well as in the young of many animal species (1, 2).  
55 Moreover, in some mammalian species astroviruses have been associated with  
56 different neurological disorders and have been found in biopsies of patients with  
57 encephalitis, meningitis or acute respiratory infections (1, 2). Given that mammalian  
58 astroviruses are considered intestinal viruses, the central question is: “How could  
59 astroviruses get into the central nervous system and respiratory tract?” (3).

60           From the structural point of view, astroviruses are small non-enveloped  
61 viruses, forming the family *Astroviridae*. They contain a single-stranded, positive  
62 sense RNA (ssRNA+) genome whose length ranges, in the case of mammalian  
63 astroviruses, from 6.1 to 6.8 kb. The astrovirus genome is organized into three open  
64 reading frames, named ORF1a, ORF1b and ORF2, which encode non-structural  
65 (ORF1a and ORF1b) and structural (ORF2) viral proteins (4, 5). Astrovirus cell entry  
66 is not completely understood, and the virus cell surface receptor is unknown,  
67 although the fact that the susceptibility of different cell lines to infection with  
68 astrovirus depends on the viral serotype (6-8), suggests that there could be more  
69 than one receptor. Astrovirus enters into cells by clathrin-mediated endocytosis and  
70 it seems that entry process follows a classical route into late endosomes (4, 9).  
71 During maturation, the astrovirus particles are subjected to distinct proteolytic  
72 processes. First, the capsid protein VP90 of the newly assembled astrovirus particles  
73 is cleaved intracellularly by caspases to give immature virions composed by the viral  
74 protein VP70. This cleavage is associated with the release of the viral particles from  
75 the infected cell (10, 11). Then, once in the extracellular medium, the virion is  
76 processed by trypsin-like extracellular proteases to render infectious, mature virions,  
77 composed by the final protein products VP27 and VP34 (12, 13).

78           One of the less characterized phases of the astrovirus replication cycle, is cell  
79 egress. It has been proposed that astrovirus release is a non-lytic process, during  
80 which the extracellular virions appear to be associated with membranous structures  
81 (11, 14). In this regard, it is of interest that the cell exit of different viruses has been  
82 associated with extracellular vesicles (EV) (15-17). EV are a heterogeneous group

83 of small vesicles with a lipidic bilayer, ranging from 50 nm to 1,000 nm of diameter  
84 (18). These vesicles are secreted by different types of cells and can be isolated from  
85 conditioned media of cultured cells, as well as from virtually any type of body fluid,  
86 including blood, urine, ascites, bronchoalveolar lavage, saliva and cerebrospinal  
87 fluid (19, 20). There are different types of EV, with exosomes being the better  
88 characterized, having a diameter of around 50 to 150 nm, and also well studied  
89 microvesicles with diameter around 50 to 1,000 nm. Exosomes originate from the  
90 endosomal compartment by fusion of multivesicular bodies with the plasma  
91 membrane, while microvesicles originate from the plasma membrane by outward  
92 budding (21).

93 Viral infections affect cell physiology, as well as many cellular processes,  
94 including protein synthesis and degradation (22, 23), intracellular trafficking and  
95 vesicle secretion (16, 24, 25). In the last few years the evidence regarding the  
96 interaction between EV and different types of viruses (26-28) has accumulated.  
97 Particularly, several positive-sense ssRNA viruses, like hepatitis C virus (HCV) and  
98 hepatitis E virus (HEV), have been found to associate with EV or to use the  
99 mechanism of EV biogenesis as an egress pathway (29-32). In addition, DNA  
100 viruses like HSV-1 (33) and JC polyomavirus (34) also have been observed  
101 interacting or being released with EV.

102 Given the possibility that EV could be involved in the human astrovirus  
103 (HAstV) cell egress, we tested the possibility that astrovirus particles could be  
104 released in association with this type of vesicles. To characterize the possible  
105 interaction between EV and the virus, Caco-2 cells were infected with the Yuc8 strain  
106 of HAstV and EV were purified from the cell culture media by differential  
107 centrifugation coupled to polyethylene glycol 6000 (PEG) precipitation and affinity  
108 magnetic sorting. Our results suggest that astrovirus infection stimulates the  
109 secretion of EV and astrovirus particles seem to associate with EV. These vesicle-  
110 associated viruses acquire the ability to infect cells in the absence of trypsin  
111 activation. Also, viral particles associated with EV were refractory to the effect of  
112 neutralizing antibodies, suggesting that EV are able to protect the virions from this  
113 interaction.

114

## 115 **Materials and methods**

116

### 117 **Cell lines, virus, reagents and antibodies**

118 Human colon adenocarcinoma cells (Caco-2), and rhesus monkey epithelial  
119 cells (MA104), were obtained from American type culture collection (ATCC,  
120 Manassas, VA, USA). Dulbecco modified Eagle medium - high glucose (DMEM) was  
121 purchased from Sigma Aldrich (San Luis, MI, USA), while Advanced-DMEM (A-  
122 DMEM), fetal bovine serum (FBS) and trypsin were from Gibco (Thermo Fisher  
123 Scientific, USA). Triton X-100 was acquired from Boehringer Mannheim, (Germany),  
124 whereas Polyethylene glycol 6000, soybean trypsin inhibitor and Minimum Essential  
125 Medium (MEM) were acquired from, Sigma-Aldrich (San Luis, MI, USA).  
126 Formaldehyde was obtained from J.T. Baker, (USA), and MagCapture™ exosome  
127 isolation kit PS was from FUJIFILM Wako Pure Chemical Corporation (Osaka,  
128 Japan). Human astrovirus serotype 8, strain Yuc8 was originally isolated in our  
129 laboratory (35). Polyclonal rabbit antibody specific for Yuc8 virus (anti-Yuc8) was  
130 prepared in our laboratory (11). Rabbit polyclonal antibodies specific for anti-CD63  
131 and anti-Alix were acquired from Santa Cruz (Santa Cruz Biotechnology, CA, USA),  
132 and Aviva Systems Biology (Aviva Systems Biology, CA, USA) respectively, while  
133 monoclonal antibody specific to anti- protein disulfide isomerase (PDI, clone 1D3)  
134 was obtained from Enzo Life Sciences, Inc (C. Mexico, Mexico). Anti-rabbit  
135 peroxidase conjugated antibody was from KPL (MD USA), and protein A, peroxidase  
136 conjugate was from Sigma Aldrich (Sigma Aldrich).

137

### 138 **Cell culture and viral propagation**

139 Caco-2 cells were cultured in DMEM supplemented with non-essential amino  
140 acids and 15% heat-inactivated FBS, in a 10% CO<sub>2</sub> atmosphere at 37°C (14). MA104  
141 cells were grown in A-DMEM, supplemented with 5% FBS, at 37°C in a 5% CO<sub>2</sub>  
142 atmosphere (36).

143 A working stock of human astrovirus serotype 8, strain Yuc8 (35), was  
144 prepared as previously described (37). The virus was activated just prior to infection

145 with 200 µg/mL of trypsin, for 1 hour at 37 °C, followed by inactivation with 200 µg/mL  
146 of soybean trypsin inhibitor. Before infection, Caco-2 cell monolayers were washed  
147 with MEM and incubated with activated virus for 1 hour at 37 °C. Then, cell  
148 monolayers were washed twice with MEM, to remove non-adsorbed virus. Finally,  
149 MEM was added to the cells, and infection was left to proceed for 48 hours at 37 °C.

150       Astrovirus particles were purified essentially as described previously (38).  
151 Briefly, Caco-2 cells were infected with HAstV serotype 8 (Yuc8) at an MOI of 5 as  
152 described above and the infection was left to proceed for 48 hours. After this time  
153 cells were detached, and frozen and thawed three times. Then, cellular lysate was  
154 clarified by centrifugation at 2,000 g for 10 minutes and then passed through a 0.45  
155 µm filter (Milipore). Filtered supernatants were pelleted at 60,000 g for 16 hours at  
156 4 °C in a SW28 Ti rotor (Beckman), and the resulting pellet was resuspended in TNE  
157 buffer (50 mM Tris-HCl [pH 7.4], 0.1 M NaCl, 10 mM EDTA). This suspension was  
158 adjusted to 0.5% v/v with octyl glucoside in TNE buffer and incubated for 30 minutes  
159 on ice. Finally, virus was pelleted through a 30% w/v sucrose cushion in TNE buffer  
160 for two hours at 200,000 g in a SW55 Ti Beckman rotor. The pelleted viral particles  
161 were resuspended in TNE buffer.

162

### 163 **Viral infectivity assay**

164       Viral titers were determined by immuno-peroxidase staining to detect  
165 infectious focus forming units (FFU) as described previously (11, 39). In brief, Caco-  
166 2 cells were cultured to confluence in 96 wells plates and washed with serum-free  
167 MEM before infection. Viral samples were activated with trypsin (200 µg/mL), for 1  
168 hour at 37 °C, soybean trypsin inhibitor was added (200 µg/mL), and serial fold  
169 dilutions of activated viral samples were performed. Diluted samples were added to  
170 each well and let to adsorb for 1 hour at 37 °C. After adsorption period, the virus  
171 inoculum in each well was removed, cells were washed twice with MEM and infection  
172 was left to proceed in fresh MEM for 18 hours at 37°C. Cells were fixed for 20  
173 minutes with 2% formaldehyde in phosphate-buffered saline (PBS), then they were  
174 washed three times with PBS and permeabilized by a 15 minutes incubation with  
175 0.2% Triton-X100 solution in PBS. Finally, cells were washed again three times with

176 PBS and incubated with a polyclonal rabbit anti-Yuc8 overnight at 4°C. Next day  
177 cells were washed out three times with PBS and incubated with peroxidase  
178 conjugated protein A for 2 hours at 37°C. After washing protein A, infected cells were  
179 revealed by carbazole precipitation and FFU were counted.

180

### 181 **Kinetics of viral release**

182 Caco-2 cells were grown to confluence in 24 wells plates. Cell monolayers  
183 were washed twice with MEM and infected with activated HAstV Yuc8 strain (at an  
184 MOI of 5). Supernatants were harvested at three hours intervals starting at 12 hours  
185 post infection (hpi) until 24 hpi, and centrifuged for 5 minutes at 500 g to separate  
186 cellular debris. At the same time, MEM was added to cellular monolayers and cells  
187 were lysed by two cycles of freeze-thaw. Infectious viral particles associated to cells  
188 and present in supernatants were determined by an immune-peroxidase assay as  
189 described above. Before trypsin activation, samples were incubated for 30 minutes  
190 at 37°C with MEM or with 0.1% Triton X-100 diluted in MEM.

191

### 192 **Purification of extracellular vesicles**

193 Caco-2 cells, grown to confluence in 150 cm<sup>2</sup> flasks, were washed twice with  
194 MEM and infected with trypsin activated HAstV Yuc8 at an MOI of 5. As a control,  
195 cells were mock infected using an identical protocol without virus. Supernatants were  
196 harvested at 18 hpi and processed by differential centrifugation essentially as  
197 described before (40, 41). Briefly, supernatants were centrifuged at 500 g for five  
198 minutes to obtain pellet 1 (P1), and the supernatant was again centrifuged at 2,000  
199 g for 30 minutes, obtaining the pellet 2 (P2). The remaining supernatant was  
200 centrifuged at 20,000 g for one hour, producing pellet 3. Finally, the last supernatant  
201 was mixed with an equal volume of a solution of 16% polyethylene glycol 6000 (PEG),  
202 1 M sodium chloride and left overnight at 4°C. The mixture was then centrifugated  
203 at 10,000 g for one hour, yielding pellet 4. As proposed by a theoretical analysis of  
204 sedimentation (42), the purified fraction in pellet 3 was considered to contain large  
205 extracellular vesicles (LEV), while the fraction of pellet 4 contains small extracellular  
206 vesicles (SEV). All centrifugations were performed at 4 °C and all pellets were



207 resuspended in sterile PBS. Virus titer in purified fractions was determined by  
208 immune-peroxidase assay, with and without TX-100 treatment as described above  
209 for supernatants in the assays of viral release kinetics.

210 For some experiments, in order to remove possible contaminants (i.e., free  
211 contaminating virions or protein aggregates) from purified vesicles in LEV or SEV  
212 fractions (pellets 3 and 4, respectively), the vesicle fractions were additionally  
213 purified using the MagCapture™ exosome isolation kit PS, according to the  
214 manufacturer protocol.

215

### 216 **Immunodetection of cellular and viral proteins**

217 The fractions purified by differential centrifugation from supernatants of  
218 infected and mock-infected Caco-2 cells were mixed with Laemmli sample buffer (50  
219 mM Tris, pH 7.5, 2% SDS, 2%  $\beta$ -mercaptoethanol, 10 mM EDTA and 0.1%  
220 bromophenol blue), boiled for 5 min and the proteins were separated by sodium  
221 dodecyl sulfate-polyacrylamide gel electrophoresis (SDS-PAGE). Proteins were  
222 transferred to a nitrocellulose membrane (Millipore, Bedford, MA, USA). Membranes  
223 were blocked with 5% non-fat dried milk in PBS. The proteins of interest were  
224 detected with specific primary antibodies followed by incubation with secondary  
225 peroxidase-conjugated reagents. Primary antibodies were incubated with  
226 membranes overnight at 4°C, washed three times with PBS 0.1% Tween (PBS-T)  
227 and incubation continued with peroxidase conjugated secondary antibody or protein  
228 A for 90 min, at room temperature. After these incubations the membranes were  
229 washed again with PBS-T and proteins were visualized by Western Lightning  
230 Chemiluminescence Reagent Plus (Perkin Elmer).

231

### 232 **Infectivity associated to the extracellular vesicles**

233 Fractions were purified from supernatant of astrovirus infected Caco-2 cells  
234 by differential centrifugation coupled with isolation with magnetic beads  
235 (MagCapture™ exosome isolation kit PS), as described above. Vesicle containing  
236 fractions were diluted in MEM and added to Caco-2 and MA104 cells, grown to  
237 confluence in 96 wells plates, washed twice with MEM before addition. The fractions



238 were subjected to the following treatments before adsorption: with 0.1% Triton X-  
239 100 for 30 minutes at 37°C; or were preincubated with an anti-Yuc8 neutralizing  
240 antibody for 1 hour at 37°C; or by an incubation with 0.1% Triton X-100 for 30  
241 minutes at 37°C, followed by neutralization with anti-Yuc8 antibody (1 hour at 37°C).  
242 Control, non-treated samples were incubated in the same conditions but using an  
243 equivalent volume of FBS-free MEM instead of Triton X-100 and/or anti-Yuc8  
244 antibody. Vesicles were left to adsorb to cells during 2 hours at 37°C, then cells were  
245 washed, fresh medium was added and the infection was left to proceed for 18 hours.

246 To test the capacity of purified EV to promote infection with externally bound  
247 virus particles, LEV and SEV vesicles were purified from non-infected Caco-2 cells  
248 as described above, including the isolation step with the MagCapture™ exosome  
249 isolation kit PS. These vesicles were then incubated for 1 hour at 37 °C with a known  
250 amount of non-activated purified HAstV Yuc8. After incubation, the vesicles were  
251 treated as described above (0.1% Triton X-100 for 30 minutes at 37°C, anti-Yuc8  
252 neutralizing antibody for 1 hour at 37°C or 0.1 % Triton X-100 followed by  
253 neutralization with anti-Yuc8 antibody). After the treatments, vesicles with virus were  
254 added to Caco-2 or MA104 cells grown in 96 wells, and incubated during 2 hours at  
255 37°C. After this time cells were washed, and infection was left to proceed for 18  
256 hours. As control, an equal amount of the identical purified trypsin activated or non-  
257 activated astrovirus was used in the same conditions without EV incubation. Infected  
258 cells were counted in selected area, of two wells per sample using 20X lens. Images  
259 were acquired with 10X lens in a Nikon Diaphot 300 microscope.

260

## 261 **Transmission Electron Microscopy**

262 LEV and SEV vesicular fractions were purified from infected Caco-2 cells as  
263 described above, using differential centrifugation coupled to isolation with the  
264 MagCapture™ exosome isolation kit PS. Purified fractions and non-activated purified  
265 virus particles were bound on carbon vaporized copper grids covered with formvar  
266 and negatively stained with 3% uranyl acetate. Images were acquired using a Zeiss  
267 Libra 120 electron microscope operating at 80 KV coupled with a GATAN Multiscan  
268 600HP 794 CCD camera.

269

## 270 **Nanoparticle Tracking Analysis**

271 Nanoparticle tracking analysis (NTA), was conducted using a NanoSight  
272 NS300 (Malvern Instruments Ltd., Worcestershire, UK) to assess the hydrodynamic  
273 diameter of non-activated virus particles and vesicles purified by differential  
274 centrifugation from infected and non-infected cells supernatants. Purified fractions  
275 were analyzed after diluting the samples in sterile and microfiltered PBS (1:100-200  
276 in the case of vesicles and 1:1000 in case of purified virus particles). For each  
277 condition 5 videos of one-minute length each, were recorded sizing 20-40  
278 particles/frame and analyzed using the NanoSight NTA 3.1 software (43). This  
279 technique uses dynamic light scattering to measure the diffusion coefficient of  
280 particles moving under Brownian motion and converts it to hydrodynamic diameter  
281 using the Stokes-Einstein equation (44). A blank of sterile filtered PBS was used for  
282 particle calculations in every measurement, and after each measurement the  
283 flushing lines were thoroughly washed three times to prevent contamination.

284

## 285 **Statistical Analysis**

286 Statistical analysis of the obtained results was performed using the GraphPad  
287 prism 5.0 software (GraphPad Software, Inc.), with an interval of confidence of 95%.

288

## 289 **Results**

### 290 **HAstV Yuc8 titer in detergent-treated media increases with time of infection**

291 It has been previously observed that a fraction of the astrovirus particles  
292 produced in infected cells floats to low-density fractions when separated by density  
293 centrifugation, suggesting that they interact with membranous structures (14). To  
294 characterize the possible association of astrovirus particles with membranes in the  
295 cell culture media, we evaluated the kinetics of astrovirus release in Caco-2 cells.  
296 Media from astrovirus infected cells were collected at different time points after  
297 infection (from 12 to 24 hpi), and the virus titer was determined. The infectivity of the  
298 virus in the supernatant was activated with trypsin after the samples were treated or  
299 not with detergent (Triton X-100). Under these conditions, if astrovirus particles were

300 associated with vesicles or membranes, the detergent treatment would release the  
301 virions, leading to an increase in viral titer as compared to the titer of samples not  
302 treated with detergent. We observed the virus present in the supernatant starting at  
303 the first time point analyzed (12 hpi), without any significant change in the titer after  
304 Triton X-100 treatment ( $p > 0.05$ ) (Fig. 1), similar to previously published results (10).  
305 The titer of virus present in the media not treated with detergent showed little  
306 increase from 15 to 24 h post infection, however, the viral titer increased  
307 considerably in the supernatant after detergent treatment, reaching almost twice as  
308 much infectivity compared to non-treated samples, at later time points (Fig. 1). No  
309 significant cellular damage was detected at the different time points (being under  
310 10% of total LDH in both mock and Yuc8 infected cells), as determined by an LDH  
311 assay (results not shown). These results suggest that astrovirus particles are  
312 released from infected cells before appreciable cell lysis, and that they could be  
313 associated with detergent soluble structures in the extracellular medium. In all the  
314 subsequent experiments shown here, media were harvested at 18 hpi.

315

### 316 **Astrovirus infection increases the secretion of extracellular vesicles** 317 **from Caco-2 cells**

318 To characterize the effect of astrovirus infection on the production of EV in  
319 Caco-2 cells, supernatants from infected or mock-infected cells cultured in serum-  
320 free MEM were harvested at 18 hpi and processed by differential centrifugation.  
321 Initially, detached cells were pelleted at 500 g for 5 min, getting pellet 1 (P1). Pellet  
322 2 (P2) was obtained by centrifugation of the remaining supernatant at 2,000 g for 30  
323 min. We expected this fraction to contain very large vesicles and some cell debris  
324 and organelles. Pellet 3 was obtained by centrifugation of the remaining supernatant  
325 at 20,000 g for 1 h, to collect large extracellular vesicles (LEV), theoretically  
326 calculated to be over 122 nm (42). Finally, pellet 4 was obtained by overnight  
327 precipitation of remaining vesicles and particles in the remaining supernatant by 8%  
328 PEG 6000 and 0.5 M NaCl, followed by centrifugation at 10,000 g for 1 h, producing  
329 small extracellular vesicles fraction (SEV), calculated to be under 170 nm (41, 42).  
330 As consequence, we expect some size overlapping between LEV and SEV fractions.

331 An equal portion of each pellet fraction was analyzed after SDS-PAGE. By  
332 silver staining of the gel, it was clear that the amount of total proteins present in each  
333 fraction was increased in astrovirus-infected cells (Fig. 2A). The presence of different  
334 cellular markers in the pelleted fractions was analyzed by immunoblotting; EV  
335 specific markers tested were CD63 and ALIX, while endoplasmic reticulum  
336 associated PDI protein was used as non-EV associated protein control. In fractions  
337 P1 and P2, which probably contain cells, cell debris and large vesicles, all proteins  
338 markers were observed, and their presence also has increased after astrovirus  
339 infection. Interestingly, the LEV and SEV fractions purified from astrovirus-infected  
340 Caco-2 cells showed a higher content of EV specific proteins (ALIX and CD63) as  
341 compared to mock-infected cells (Fig. 2B), presumably representing larger amounts  
342 of EVs. (Fig. 2B).

343 To quantitate the concentration and size of the purified vesicles more  
344 precisely, the pellet 3 (LEV fraction) and the fraction purified after PEG 6000  
345 precipitation (SEV fraction) were analyzed by nanoparticle tracking analysis (Fig. 3).  
346 There was a clear and significant increase in the vesicle number in the LEV fraction  
347 from Yuc8-infected cells ( $p < 0.05$ ), compared to that of mock-infected cells (Fig. 3A  
348 and 3C). In the case of the SEV fraction obtained by PEG 6000 precipitation, there  
349 was only a small, not significant increase ( $p > 0.05$ ) on the number of vesicles present  
350 in preparations obtained from either infected cells or mock-infected cells (Fig. 3B  
351 and 3C). These results suggest that astrovirus infection might stimulate the  
352 production of EV, particularly those present in the LEV fraction.

353

### 354 **Astrovirus particles seem to associate with extracellular vesicles**

355 Given the presence of vesicles with different sizes in the cell culture medium,  
356 we analyzed whether astrovirus particles were associated with a particular fraction  
357 and if an increased infectivity could be observed after treating the different fractions  
358 with Triton X-100 before activation of the virus with trypsin. We found that different  
359 amounts of infectious viral particles were present in fractions P2, LEV, and SEV;  
360 treatment with Triton X-100 before trypsin activation significantly increased virus titer  
361 in fractions P2 ( $p < 0.05$ ) and LEV ( $p < 0.01$ ), but not in fraction SEV (Fig. 4A). These

362 observations suggest that a portion of the astrovirus particles could be present inside  
363 vesicles or, alternatively, that groups of viral particles could be associated with EV  
364 from the outside, and consequently membrane solubilization releases individual  
365 particles, increasing virus titer.

366 To determine if there is a direct association between virions and vesicles in  
367 the LEV fraction, we analyzed by transmission electron microscopy (TEM) this  
368 fraction purified from astrovirus infected Caco2 cells. The LEV fraction was chosen  
369 since the largest increase in virus infectivity when the trypsin activation was done  
370 after the Triton X-100 treatment was observed in this fraction. By TEM we found  
371 virus-like particles, associated with what appeared to be vesicles (Fig. 4B, pointed  
372 by arrows). The electro-dense virus-like particles observed in this micrograph, are  
373 similar in form and size (30 nm) to purified astrovirus particles (Fig. 4C), suggesting  
374 that they represent bona-fide virus particles associated with membranes. Such virus-  
375 like particles were not observed in vesicles present in LEV fraction purified from  
376 mock-infected cells (data not shown). Since the infectivity of astroviruses requires  
377 activation by proteolytic processing of the VP70 protein precursor, we analyzed by  
378 western blot the virus protein composition of the LEV-associated virions. We  
379 observed that the virus particles are mainly composed by the VP70 protein (70 KDa)  
380 with no evidence of neither VP90 precursor protein, nor any activated viral proteins  
381 of 34, 27 or 25 KDa proteins (Fig. 4D).

382

### 383 **Vesicle-associated astrovirus particles are infectious without** 384 **proteolytic treatment and are protected from antibody neutralization**

385 EVs have an intrinsic capacity to fuse with other cells, and thus to transfer  
386 proteins, genetic material, and even viral particles to other recipient cells (16, 21, 24,  
387 45). Using this mechanism, different types of viruses are able to infect otherwise  
388 refractory cells. Such is the case of human immunodeficiency virus 1 (HIV-1) (46,  
389 47) and herpes simplex virus 1 (HSV-1) (33). The association with vesicles has also  
390 been shown to confer some viruses with resistance to neutralization with specific  
391 antibodies [hepatitis A virus (HAV), or HSV-1] (33, 48). To test whether vesicle-  
392 associated astrovirus strain Yuc8 is able to infect other cell lines, vesicles present in

393 the LEV and SEV fractions purified from infected Caco-2 cells were added to Caco-  
394 2 and MA104 cells. Caco-2 cells were used as fully permissive cell line, while MA104  
395 cells are at least 100 times less permissive to astrovirus Yuc8 infection (8, 49).  
396 Before adding to the cell monolayers, the samples were either incubated with 0.1%  
397 Triton X-100 for 1 h to disrupt possible membranes; or incubated with polyclonal  
398 neutralizing polyclonal antibodies to Yuc8 to neutralize the infectivity of accessible  
399 viral particles; or incubated with detergent followed by neutralization with the  
400 neutralizing polyclonal antibodies in order to neutralize all viral particles present. As  
401 control, fractions were only incubated in MEM.

402 The results of these assays show that the LEV and SEV vesicle-associated  
403 astrovirus viral particles were able to infect both Caco-2 and MA104 cells (Fig. 5A  
404 and B), while viral infection was completely abolished after membrane solubilization  
405 with Triton X-100, suggesting that membranes or vesicles are indispensable for  
406 infection, since astrovirus particles in these assays were not proteolytically activated.  
407 Preincubation of both types of vesicles with anti-Yuc8 neutralizing polyclonal  
408 antibody left a fraction of virus particles infectious, suggesting that some of these  
409 viruses (10-20%) were protected from the neutralization by the antibodies, possibly  
410 by being inside the vesicles (Fig. 5A, B and C). Accordingly, pretreatment of the  
411 vesicle fractions with detergent, allowed complete antibody neutralization of the virus  
412 particles (Fig. 5A and B), supporting the hypothesis that vesicles in these fractions  
413 are important to allow viral infection and to shield viral particles from neutralizing  
414 antibodies.

415 Protected viral particles were observed in both, LEV and SEV fractions, and  
416 they were able to infect a similar number of both Caco-2 and MA104 cells (Fig. 5C).  
417 When the infectivity was compared between Caco-2 and MA104 cells, Caco-2 cells  
418 showed more infected cells by LEV fraction than MA104 cells, while infection  
419 associated with SEV fraction was similar between both cell lines (Fig. 5C). In Caco-  
420 2 cells there were more infected cells after infection with vesicles from LEV fraction,  
421 as compared to SEV fraction, while in MA104 cells infectivity of these two fractions  
422 was similar (Fig. 5C).

423



424           **Association of non-activated astrovirus Yuc8 with purified EVs**  
425           **enhances viral infectivity**

426           To further evaluate the possibility that the association of the virus with  
427           membranous structures promotes virus infectivity without the need of trypsin  
428           treatment, non-activated purified Yuc8 particles were incubated for 1 h at 37 °C with  
429           LEV and SEV fractions obtained from supernatants of mock-infected Caco-2 cells.  
430           After virus-EV incubation, the virus-vesicle mixture was subjected to the same  
431           treatments described in the previous experiment: neutralization with polyclonal anti-  
432           Yuc8 antibody, membrane solubilization by incubation with 0.1% Triton X-100, or  
433           detergent treatment followed by neutralization. Untreated virus-vesicle samples, in  
434           MEM, were used as control. After treatment, the samples were added to Caco-2 and  
435           MA104 monolayers and infection was left to proceed as described. The non-  
436           activated astrovirus particles that were incubated with both types of purified vesicles  
437           (LEV and SEV fractions) acquired the capacity to infect both Caco-2 and MA104  
438           cells (Fig. 6A and B). Detergent treatment of the samples before addition to the cells  
439           abolished the infectivity in both cell lines, again confirming the contribution of  
440           membrane vesicles to viral infectivity of particles non-activated by trypsin, possibly  
441           by direct interaction between virus and vesicles (Fig. 6A and B). Pre-incubation with  
442           neutralizing antibodies abolished infectivity, suggesting that all viral particles were  
443           accessible to the antibodies. Of note, no infection was detected when either cell line  
444           was incubated with the same amount of non-activated virus, in the absence of  
445           vesicles, unless the virus was activated by treatment with trypsin (Fig. 6C). As  
446           expected, the combined treatment of detergent and neutralizing antibodies also  
447           abolished the infection (Fig. 6A and B). These results suggest that free viral particles  
448           could associate with vesicles, and this interaction facilitates their cell entry and  
449           infectivity, even if the virus is not activated. When the infectivity of the vesicle-  
450           associated non-activated astrovirus particles was compared in Caco-2 and MA104  
451           cells, both LEV and SEV fractions showed similar capacity to promote infection in  
452           both cell lines (Fig. 6C). Of interest, non-activated astrovirus particles incubated with  
453           purified EV, infected MA104 cells more efficiently (>200%) than the same amount of  
454           free virus activated with trypsin (Fig. 6C), while in Caco-2 cells (astrovirus fully



455 permissive cell line), the vesicle-associated particles had a 17% average infectivity  
456 of the free, trypsin activated virus (Fig. 6C).

457

## 458 **Discussion**

459       Astrovirus cell release has been reported to be a non-lytic process promoted  
460 by caspase processing of the viral capsid-precursor protein VP90 to VP70 (10, 11).  
461 It is a gradual process in which the majority of the new particles (about 90% of the  
462 total progeny) remain inside infected cells, and only 10% are released to the  
463 extracellular media (10). In this study, we found that a portion of the new progeny  
464 was present in the cell supernatant as early as 12 hpi and the amount of released  
465 virus increased with time. Interestingly, starting at 15 hpi, a significant portion of the  
466 released virus particles were not susceptible to trypsin treatment, and required to be  
467 solubilized from their association with membranous structures by detergent  
468 treatment, to become accessible to the protease. The amount of virus protected from  
469 trypsin increased with time. This observation suggests that there could be more  
470 potentially infectious virus particles in the extracellular media than originally thought  
471 (10), most probably explained by the association of viruses with EVs.

472       Using differential centrifugation, we purified several fractions of EV from the  
473 media of astrovirus Yuc8 infected Caco-2 cells, and two of these fractions were  
474 characterized in more detail: the LEV fraction, obtained after cellular debris depletion  
475 and by centrifugation for 1 h at 20,000 g; and the SEV fraction, purified after PEG  
476 6000 based precipitation and centrifugation at 10,000 g (40, 42). Both fractions  
477 contained markers of extracellular vesicles, CD63 and Alix. Since CD63 is an  
478 specific marker of exosomes (50, 51), and ALIX has been reported to be involved in  
479 both microvesicle and exosome biogenesis (45), it is possible that both of these  
480 vesicles, which overlap in size, are present in both fractions. Analysis of the  
481 concentration and size of the vesicles in LEV and SEV fractions by nanoparticle  
482 tracking showed partial overlap in size, however the LEV fractions showed a  
483 significant increase in the vesicle number when infected versus mock-infected  
484 conditions were compared. A similar increase in EV secretion after infection was

485 also reported with other viruses, like HIV-1 (52, 53), HSV-1 (33, 54), rotavirus (27)  
486 and tick-borne Langkat virus (55).

487 Different viruses have been found to be able to interact directly with EV.  
488 Among these, hepatitis A virus (HAV) (48), HCV (29), HSV-1 (33), and JC  
489 polyomavirus (34). Analysis of the LEV fraction, purified from astrovirus-infected  
490 cells, showed electron-dense astrovirus-like particles associated with vesicles of about  
491 200 nm, resembling the appearance of extracellular vesicles (56). The membranous  
492 structures observed by TEM seem to associate with more than one viral particle.  
493 This observation opens up the possibility that during astrovirus infection, EV could  
494 participate both as virion carriers, protecting the virions, as well as a form of  
495 concentrating viral particles, forming the so-called collective infectious units (CIU),  
496 capable of gathering together several infectious particles. Similar observations have  
497 been made recently for rotavirus and norovirus, where several viral particles were  
498 reported to be associated with vesicles (27, 57).

499 It has been described previously that the association with vesicles could  
500 protect some viruses from neutralization by antibodies, for example hepatitis A, B  
501 and C viruses (29, 48, 58), and HSV-1 (33), among others. In this work we observed  
502 that a portion of the astrovirus particles present in LEV and SEV fractions remained  
503 infectious even after incubation with an anti-Yuc8 neutralizing antibody, suggesting  
504 that a portion of the isolated astrovirus particles were inaccessible to the neutralizing  
505 antibodies. The presence of vesicles was crucial for the infectivity of these non-  
506 activated viral particles, since the solubilization of membranes with detergent  
507 abrogated all infectivity. To confirm that vesicles are important in non-activated  
508 astrovirus infectivity, LEV and SEV vesicles were purified from non-infected Caco-2  
509 cells, and then incubated with non-trypsin-activated purified astrovirus particles. Our  
510 results showed that the purified virus was able to interact with these vesicles, and  
511 acquired the capacity to enter and infect the cells without protease activation. It is  
512 not clear if these interactions between astrovirus particle and EVs interaction are  
513 specific or not, but the virus particles in this mix acquired the capacity to infect even  
514 low-susceptibility cells like MA104. The infectivity was abolished by solubilization of  
515 the vesicles with detergent, or by incubation with neutralizing antibodies, suggesting

516 that the interaction between viral particles and EV somehow facilitates the interaction  
517 between the virus and the cell surface.

518 Since extracellular vesicles could facilitate the internalization of the virus  
519 apparently through a viral receptor independent pathway, the viral particles  
520 associated with vesicles could be internalized by a mechanism triggered by vesicles  
521 themselves (59). The incubation of non-activated purified astrovirus with LEV or SEV  
522 fractions leads to similar level of infection in both Caco-2 and MA104 cells, while  
523 non-activated purified astrovirus particles were not able to infect these cell lines.  
524 These results suggest that the astrovirus proteolytic processing by trypsin  
525 (activation), is important for virus-cell adhesion and/or entry, but probably not for the  
526 decapsidation process. The ability of astrovirus particles associated with vesicles to  
527 infect not only susceptible Caco-2 cells, but also the poorly susceptible MA104 cell  
528 line (Fig 6C), suggest that the vesicle-associated virus particles could bypass certain  
529 blocks in astrovirus tropism, probably the specific virus-receptor interaction,  
530 potentially increasing their pathogenicity. This observation also suggest that  
531 extracellular vesicles could help astrovirus to disseminate outside the  
532 gastrointestinal tract like it has been reported before for HAstV serotype 4 and the  
533 novel astroviruses strains MLB and VA (2), possibly by allowing astroviruses to avoid  
534 the immune response and cellular barriers until they get into permissive cells far  
535 away from their common environment (gastrointestinal tract).

536 Our observations suggest the possibility that EV could be acting as platforms  
537 to create collective infectious units (60, 61), rendering virus particles insensitive to  
538 neutralization with antibodies and promoting their internalization in a non-receptor  
539 dependent manner. The mechanisms by which EV promote viral internalization in  
540 new cells remain unclear, as well as the contribution of EV to the whole astrovirus  
541 infectivity.

542

### 543 **Acknowledgments**

544 This work was supported by grants 254608 and 302965 from CONACyT (Mexico).  
545 We thank to Dra. Guadalupe Zavala for her assistance in transmission electron  
546 microscopy. Carlos Baez-N was recipient of scholarship from CONACyT (Mexico),

547 No. 464741 for MS degree, and had support from the postgraduate studies program  
548 (PAEP) of the National Autonomous University of Mexico (UNAM).

549

## 550 **References**

551

- 552 1. Meliopoulos V, Schultz-Cherry S. 2012. Astrovirus Pathogenesis., p 65-75. *In* Schultz-Cherry  
553 S (ed), *Astrovirus Research*. Springer, New York, NY.
- 554 2. Vu DL, Bosch A, Pinto RM, Guix S. 2017. Epidemiology of Classic and Novel Human  
555 Astrovirus: Gastroenteritis and Beyond. *Viruses* 9.
- 556 3. Vu DL, Cordey S, Brito F, Kaiser L. 2016. Novel human astroviruses: Novel human diseases?  
557 *J Clin Virol* 82:56-63.
- 558 4. Bosch A, Pinto RM, Guix S. 2014. Human astroviruses. *Clin Microbiol Rev* 27:1048-74.
- 559 5. E. M, Arias CF. 2013. Astroviruses, p 1347-1401. *In* Knipe DM (ed), *Fields Virology*, vol 2.  
560 Lippincott Williams & Wilkins, Philadelphia.
- 561 6. Aguilar-Hernandez N, Meyer L, Lopez S, DuBois RM, Arias CF. 2020. Protein Disulfide  
562 Isomerase A4 Is Involved in Genome Uncoating during Human Astrovirus Cell Entry. *Viruses*  
563 13.
- 564 7. Arias CF, DuBois RM. 2017. The Astrovirus Capsid: A Review. *Viruses* 9.
- 565 8. Brinker JP, Blacklow NR, Herrmann JE. 2000. Human astrovirus isolation and propagation in  
566 multiple cell lines. *Arch Virol* 145:1847-56.
- 567 9. Mendez E, Arias CF. 2013. Astroviruses, p 1347-1401. *In* Knipe DM (ed), *Fields Virology*.  
568 Lippincott Williams and Wilkins, Philadelphia.
- 569 10. Banos-Lara Mdel R, Mendez E. 2010. Role of individual caspases induced by astrovirus on  
570 the processing of its structural protein and its release from the cell through a non-lytic  
571 mechanism. *Virology* 401:322-32.
- 572 11. Mendez E, Salas-Ocampo E, Arias CF. 2004. Caspases mediate processing of the capsid  
573 precursor and cell release of human astroviruses. *J Virol* 78:8601-8.
- 574 12. Aguilar-Hernandez N, Lopez S, Arias CF. 2018. Minimal capsid composition of infectious  
575 human astrovirus. *Virology* 521:58-61.
- 576 13. Mendez E, Fernandez-Luna T, Lopez S, Mendez-Toss M, Arias CF. 2002. Proteolytic  
577 processing of a serotype 8 human astrovirus ORF2 polyprotein. *J Virol* 76:7996-8002.
- 578 14. Mendez E, Aguirre-Crespo G, Zavala G, Arias CF. 2007. Association of the astrovirus  
579 structural protein VP90 with membranes plays a role in virus morphogenesis. *J Virol*  
580 81:10649-58.
- 581 15. Altan-Bonnet N, Chen YH. 2015. Intercellular Transmission of Viral Populations with Vesicles.  
582 *J Virol* 89:12242-4.
- 583 16. Barteneva NS, Maltsev N, Vorobjev IA. 2013. Microvesicles and intercellular communication  
584 in the context of parasitism. *Front Cell Infect Microbiol* 3:49.
- 585 17. Schorey JS, Cheng Y, Singh PP, Smith VL. 2015. Exosomes and other extracellular vesicles in  
586 host-pathogen interactions. *EMBO Rep* 16:24-43.
- 587 18. Raposo G, Stoorvogel W. 2013. Extracellular vesicles: exosomes, microvesicles, and friends.  
588 *J Cell Biol* 200:373-83.
- 589 19. Minciocchi VR, Freeman MR, Di Vizio D. 2015. Extracellular vesicles in cancer: exosomes,  
590 microvesicles and the emerging role of large oncosomes. *Semin Cell Dev Biol* 40:41-51.

- 591 20. Thery C, Witwer KW, Aikawa E, Alcaraz MJ, Anderson JD, Andriantsitohaina R, Antoniou A,  
592 Arab T, Archer F, Atkin-Smith GK, Ayre DC, Bach JM, Bachurski D, Baharvand H, Balaj L,  
593 Baldacchino S, Bauer NN, Baxter AA, Bebawy M, Beckham C, Bedina Zavec A, Benmoussa A,  
594 Berardi AC, Bergese P, Bielska E, Blenkiron C, Bobis-Wozowicz S, Boilard E, Boireau W,  
595 Bongiovanni A, Borrás FE, Bosch S, Boulanger CM, Breakefield X, Breglio AM, Brennan MA,  
596 Brigstock DR, Brisson A, Broekman ML, Bromberg JF, Bryl-Gorecka P, Buch S, Buck AH,  
597 Burger D, Busatto S, Buschmann D, Bussolati B, Buzas EI, Byrd JB, Camussi G, et al. 2018.  
598 Minimal information for studies of extracellular vesicles 2018 (MISEV2018): a position  
599 statement of the International Society for Extracellular Vesicles and update of the  
600 MISEV2014 guidelines. *J Extracell Vesicles* 7:1535750.
- 601 21. Thery C, Ostrowski M, Segura E. 2009. Membrane vesicles as conveyors of immune  
602 responses. *Nat Rev Immunol* 9:581-93.
- 603 22. Casorla-Perez LA, Lopez T, Lopez S, Arias CF. 2018. The Ubiquitin-Proteasome System Is  
604 Necessary for Efficient Replication of Human Astrovirus. *J Virol* 92.
- 605 23. Karpe YA, Meng XJ. 2012. Hepatitis E virus replication requires an active ubiquitin-  
606 proteasome system. *J Virol* 86:5948-52.
- 607 24. Kourembanas S. 2015. Exosomes: vehicles of intercellular signaling, biomarkers, and vectors  
608 of cell therapy. *Annu Rev Physiol* 77:13-27.
- 609 25. Lai FW, Lichty BD, Bowdish DM. 2015. Microvesicles: ubiquitous contributors to infection  
610 and immunity. *J Leukoc Biol* 97:237-45.
- 611 26. Altan-Bonnet N. 2016. Extracellular vesicles are the Trojan horses of viral infection. *Curr*  
612 *Opin Microbiol* 32:77-81.
- 613 27. Isa P, Perez-Delgado A, Quevedo IR, Lopez S, Arias CF. 2020. Rotaviruses Associate with  
614 Distinct Types of Extracellular Vesicles. *Viruses* 12.
- 615 28. Meckes DG, Jr. 2015. Exosomal communication goes viral. *J Virol* 89:5200-3.
- 616 29. Liu Z, Zhang X, Yu Q, He JJ. 2014. Exosome-associated hepatitis C virus in cell cultures and  
617 patient plasma. *Biochem Biophys Res Commun* 455:218-22.
- 618 30. Nagashima S, Jirintai S, Takahashi M, Kobayashi T, Tanggis, Nishizawa T, Kouki T, Yashiro T,  
619 Okamoto H. 2014. Hepatitis E virus egress depends on the exosomal pathway, with  
620 secretory exosomes derived from multivesicular bodies. *J Gen Virol* 95:2166-2175.
- 621 31. Nagashima S, Takahashi M, Kobayashi T, Tanggis, Nishizawa T, Nishiyama T, Primadharsini  
622 PP, Okamoto H. 2017. Characterization of the Quasi-Enveloped Hepatitis E Virus Particles  
623 Released by the Cellular Exosomal Pathway. *J Virol* 91.
- 624 32. Tamai K, Shiina M, Tanaka N, Nakano T, Yamamoto A, Kondo Y, Kakazu E, Inoue J, Fukushima  
625 K, Sano K, Ueno Y, Shimosegawa T, Sugamura K. 2012. Regulation of hepatitis C virus  
626 secretion by the Hrs-dependent exosomal pathway. *Virology* 422:377-85.
- 627 33. Bello-Morales R, Praena B, de la Nuez C, Rejas MT, Guerra M, Galan-Ganga M, Izquierdo M,  
628 Calvo V, Krummenacher C, Lopez-Guerrero JA. 2018. Role of Microvesicles in the Spread of  
629 Herpes Simplex Virus 1 in Oligodendrocytic Cells. *J Virol* 92.
- 630 34. Morris-Love J, Gee GV, O'Hara BA, Assetta B, Atkinson AL, Dugan AS, Haley SA, Atwood WJ.  
631 2019. JC Polyomavirus Uses Extracellular Vesicles To Infect Target Cells. *mBio* 10.
- 632 35. Mendez-Toss M, Romero-Guido P, Munguia ME, Mendez E, Arias CF. 2000. Molecular  
633 analysis of a serotype 8 human astrovirus genome. *J Gen Virol* 81:2891-2897.
- 634 36. Ocegüera A, Peralta AV, Martínez-Delgado G, Arias CF, Lopez S. 2018. Rotavirus RNAs  
635 sponge host cell RNA binding proteins and interfere with their subcellular localization.  
636 *Virology* 525:96-105.

- 637 37. Mendez E, Salas-Ocampo MP, Munguia ME, Arias CF. 2003. Protein products of the open  
638 reading frames encoding nonstructural proteins of human astrovirus serotype 8. *J Virol*  
639 77:11378-84.
- 640 38. Sanchez-Fauquier A, Carrascosa AL, Carrascosa JL, Otero A, Glass RI, Lopez JA, San Martin C,  
641 Melero JA. 1994. Characterization of a human astrovirus serotype 2 structural protein  
642 (VP26) that contains an epitope involved in virus neutralization. *Virology* 201:312-20.
- 643 39. Guerrero CA, Zarate S, Corkidi G, Lopez S, Arias CF. 2000. Biochemical characterization of  
644 rotavirus receptors in MA104 cells. *J Virol* 74:9362-71.
- 645 40. Rider MA, Hurwitz SN, Meckes DG, Jr. 2016. ExtraPEG: A Polyethylene Glycol-Based Method  
646 for Enrichment of Extracellular Vesicles. *Sci Rep* 6:23978.
- 647 41. Thery C, Amigorena S, Raposo G, Clayton A. 2006. Isolation and characterization of  
648 exosomes from cell culture supernatants and biological fluids. *Curr Protoc Cell Biol* Chapter  
649 3:Unit 3 22.
- 650 42. Livshits MA, Khomyakova E, Evtushenko EG, Lazarev VN, Kulemin NA, Semina SE, Generozov  
651 EV, Govorun VM. 2015. Isolation of exosomes by differential centrifugation: Theoretical  
652 analysis of a commonly used protocol. *Sci Rep* 5:17319.
- 653 43. Quevedo IR, O'sson ALJ, Clark RJ, Veinot JGC, Tufenkji N. 2014. Interpreting deposition  
654 behavior of polydisperse surface-modified nanoparticles using QCM-D and sand-packed  
655 columns. *Environmental Engineering Science*, 31:326-337.
- 656 44. Hasseløw M, Kaegi R. 2009. Analysis and characterization of manufactured nanoparticles in  
657 aquatic environments., p 211-266. *In* Lead JR, Smith E (ed), *Environmental and human*  
658 *health impacts of nanotechnology*. Wiley, Chichester, West Sussex.
- 659 45. van Niel G, D'Angelo G, Raposo G. 2018. Shedding light on the cell biology of extracellular  
660 vesicles. *Nat Rev Mol Cell Biol* 19:213-228.
- 661 46. Mack M, Kleinschmidt A, Bruhl H, Klier C, Nelson PJ, Cihak J, Plachy J, Stangassinger M, Erfle  
662 V, Schlöndorff D. 2000. Transfer of the chemokine receptor CCR5 between cells by  
663 membrane-derived microparticles: a mechanism for cellular human immunodeficiency virus  
664 1 infection. *Nat Med* 6:769-75.
- 665 47. Rozmyslowicz T, Majka M, Kijowski J, Murphy SL, Conover DO, Poncz M, Ratajczak J, Gaulton  
666 GN, Ratajczak MZ. 2003. Platelet- and megakaryocyte-derived microparticles transfer  
667 CXCR4 receptor to CXCR4-null cells and make them susceptible to infection by X4-HIV. *AIDS*  
668 17:33-42.
- 669 48. Feng Z, Hensley L, McKnight KL, Hu F, Madden V, Ping L, Jeong SH, Walker C, Lanford RE,  
670 Lemon SM. 2013. A pathogenic picornavirus acquires an envelope by hijacking cellular  
671 membranes. *Nature* 496:367-71.
- 672 49. Aguilar-Hernandez N. 2018. Caracterización de las interacciones tempranas de astrovirus de  
673 humano con células permisivas y resistentes a la infección. master. Universidad Nacional  
674 Autónoma de México.
- 675 50. Kalra H, Simpson RJ, Ji H, Aikawa E, Altevogt P, Askenase P, Bond VC, Borrás FE, Breakefield  
676 X, Budnik V, Buzas E, Camussi G, Clayton A, Cocucci E, Falcon-Perez JM, Gabriëlsson S, Gho  
677 YS, Gupta D, Harsha HC, Hendrix A, Hill AF, Inal JM, Jenster G, Kramer-Albers EM, Lim SK,  
678 Llorente A, Lotvall J, Marcilla A, Mincheva-Nilsson L, Nazarenko I, Nieuwland R, Nolte-  
679 Hoen EN, Pandey A, Patel T, Piper MG, Pluchino S, Prasad TS, Rajendran L, Raposo G, Record  
680 M, Reid GE, Sanchez-Madrid F, Schiffelers RM, Siljander P, Stensballe A, Stoorvogel W,  
681 Taylor D, Thery C, Valadi H, van Balkom BW, et al. 2012. Vesiclepedia: a compendium for  
682 extracellular vesicles with continuous community annotation. *PLoS Biol* 10:e1001450.
- 683 51. Kowal J, Arras G, Colombo M, Jouve M, Morath JP, Primdal-Bengtson B, Dingli F, Loew D,  
684 Tkach M, Thery C. 2016. Proteomic comparison defines novel markers to characterize



- 685 heterogeneous populations of extracellular vesicle subtypes. *Proc Natl Acad Sci U S A*  
686 113:E968-77.
- 687 52. Arenaccio C, Chiozzini C, Columba-Cabezas S, Manfredi F, Affabris E, Baur A, Federico M.  
688 2014. Exosomes from human immunodeficiency virus type 1 (HIV-1)-infected cells license  
689 quiescent CD4+ T lymphocytes to replicate HIV-1 through a Nef- and ADAM17-dependent  
690 mechanism. *J Virol* 88:11529-39.
- 691 53. Kulkarni R, Prasad A. 2017. Exosomes Derived from HIV-1 Infected DCs Mediate Viral trans-  
692 Infection via Fibronectin and Galectin-3. *Sci Rep* 7:14787.
- 693 54. Deschamps T, Kalamvoki M. 2018. Extracellular Vesicles Released by Herpes Simplex Virus  
694 1-Infected Cells Block Virus Replication in Recipient Cells in a STING-Dependent Manner. *J*  
695 *Virol* 92.
- 696 55. Zhou W, Woodson M, Neupane B, Bai F, Sherman MB, Choi KH, Neelakanta G, Sultana H.  
697 2018. Exosomes serve as novel modes of tick-borne flavivirus transmission from arthropod  
698 to human cells and facilitates dissemination of viral RNA and proteins to the vertebrate  
699 neuronal cells. *PLoS Pathog* 14:e1006764.
- 700 56. Rikkert LG, Nieuwland R, Terstappen L, Coumans FAW. 2019. Quality of extracellular vesicle  
701 images by transmission electron microscopy is operator and protocol dependent. *J Extracell*  
702 *Vesicles* 8:1555419.
- 703 57. Santiana M, Ghosh S, Ho BA, Rajasekaran V, Du WL, Mutsafi Y, De Jesus-Diaz DA, Sosnovtsev  
704 SV, Levenson EA, Parra GI, Takvorian PM, Cali A, Bleck C, Vlasova AN, Saif LJ, Patton JT,  
705 Lopalco P, Corcelli A, Green KY, Altan-Bonnet N. 2018. Vesicle-Cloaked Virus Clusters Are  
706 Optimal Units for Inter-organismal Viral Transmission. *Cell Host Microbe* 24:208-220 e8.
- 707 58. Yang Y, Han Q, Hou Z, Zhang C, Tian Z, Zhang J. 2017. Exosomes mediate hepatitis B virus  
708 (HBV) transmission and NK-cell dysfunction. *Cell Mol Immunol* 14:465-475.
- 709 59. McKelvey KJ, Powell KL, Ashton AW, Morris JM, McCracken SA. 2015. Exosomes:  
710 Mechanisms of Uptake. *J Circ Biomark* 4:7.
- 711 60. Sanjuan R. 2017. Collective Infectious Units in Viruses. *Trends Microbiol* 25:402-412.
- 712 61. Sanjuan R. 2018. Collective properties of viral infectivity. *Curr Opin Virol* 33:1-6.

713

## 714 **Figure legends**

715 **Figure 1. Kinetics of astrovirus release from infected Caco-2 cells.** Caco-  
716 2 cells were infected with astrovirus Yuc8 at MOI of 5 and supernatants were  
717 collected at different time points post infection (from 12 to 24 hours). Viral titer was  
718 determined with (grey bars) and without (white bars) 0.1% Triton X-100 treatment  
719 before trypsin activation. The results represent the mean focus forming units (FFU)  
720 per milliliter (mL)  $\pm$  standard error of the mean of three independent experiments  
721 done in duplicate. Statistical analysis was done with two-way ANOVA, p value  
722 \* $<0.05$ ; \*\*  $p<0.01$ , \*\*\*  $p<0.001$ .

723

724 **Figure 2. Identification of vesicular markers in vesicles purified from**  
725 **Caco-2 cells.** Caco-2 cells were infected or mock-infected with astrovirus strain



726 Yuc8 (MOI 5) and 18 hours post infection the supernatant was collected. Different  
727 fractions were purified by differential centrifugation; pellet 1 was obtained by  
728 centrifugation at 500 g (P1), pellet 2 obtained by centrifugation at 2,000 g (P2),  
729 fraction containing large extracellular vesicles (LEV) was obtained after 20,000 g  
730 centrifugation and final small extracellular vesicles (SEV) fraction was obtained by  
731 precipitation with 8% polyethylene glycol 6000, 0.5M NaCl. (A) The same volume of  
732 each pelleted fraction was separated by SDS-PAGE and proteins were detected by  
733 silver staining. (B) Samples were resolved on SDS-PAGE and analyzed by western  
734 blotting, using antibodies specific for CD63 and Alix as vesicle markers and protein  
735 disulfide isomerase (PDI) as endoplasmic reticulum protein to assess preparation  
736 contamination. Immunoblots are representative of five independent experiments.

737 **Figure 3. Astrovirus Yuc8 infection stimulates secretion of extracellular**  
738 **vesicles in Caco-2 cells.** Confluent grown Caco-2 cells were infected with  
739 astrovirus Yuc8 (MOI 5) or mock infected. Supernatants were harvested 18 hours  
740 post infection and processed by differential centrifugation. Fractions obtained after  
741 pelleting at 20,000 g, corresponding to large extracellular vesicles (LEV) (A) and  
742 obtained after PEG 6000 precipitation, small extracellular vesicles (SEV) (B), were  
743 resuspended in PBS and used for nanoparticle tracking analysis in the NanoSight  
744 NS300. In each experiment five videos were recorded and used for analysis.  
745 Distribution of particle-vesicle size (hydrodynamic diameter in nm) and concentration  
746 (particles/mL) from 3 to 5 independent experiments are shown. Vesicles purified  
747 from mock infected cells are represented by blue line, Yuc8 purified vesicles are  
748 represented by red line. (C) Comparison of the mean number of particles present in  
749 LEV and SEV fractions shown in A and B. All results are expressed as the mean of  
750 the whole concentration of particles  $\pm$  standard error of the mean of three  
751 independent experiments. Statistical analysis was done using two-way ANOVA \*  
752  $p < 0.05$ .

753 **Figure 4. Astrovirus particles associate with large extracellular vesicles.**  
754 Confluent grown Caco-2 cells were infected with astrovirus Yuc8 (MOI 5) or mock  
755 infected. Supernatants were harvested 18 hours post infection and processed by  
756 differential centrifugation. Fraction pellet 2 was obtained by centrifugation at 2,000 g

757 (P2), fraction containing large extracellular vesicles (LEV) was obtained after  
758 centrifugation at 20,000 g and final small extracellular vesicles (SEV) fraction was  
759 obtained by precipitation with PEG 6000, and NaCl after centrifugation at 10,000 g.  
760 All fractions were resuspended in same volume (100  $\mu$ L) of sterile PBS. (A) Purified  
761 fractions were trypsin activated, with or without previous incubation with detergent,  
762 and titered in Caco-2 cells. Viral content was expressed as total focus forming units.  
763 Grey bars represent samples treated with 0.1% Triton X-100 prior trypsin activation;  
764 white bars (MEM), represent samples activated with trypsin without Triton X-100  
765 treatment. The mean of viral particles in each sample  $\pm$  standard error of the mean  
766 of three independent experiments are shown. (B) Large extracellular vesicles  
767 purified from Yuc8 infected Caco-2 cells as described in A were further clarified by  
768 additional isolation using MagCapture™ Exosome Isolation kit PS. One drop of  
769 sample was fixed onto carbon vaporized copper grids and negative stained with uranyl  
770 acetate. Samples were observed in EFTEM ZEISS Libra 120 electron microscope.  
771 Electron dense particles of 30 nm, possibly viral particles, are pointed by black arrows.  
772 (C) Purified Yuc8 virions were bound to carbon vaporized copper grids and stained  
773 as described in B. Electron dense particles, which resemble astrovirus particles are  
774 pointed by arrows. Size bars are shown. (D) Immunoblotting of LEV fraction. Sample  
775 used in A, purified from Caco-2 infected cells as described in A, was not-treated  
776 (lane 1) or treated (lane 2) with trypsin, and separated in SDS-PAGE, transferred to  
777 nitrocellulose membrane and viral proteins were detected using anti-astrovirus  
778 polyclonal antibody. Viral proteins are pointed on right hand side, while molecular  
779 weight in kilodaltons is shown on left hand side. Images are representative of three  
780 independent experiments yielding similar results. Statistical analysis was done with  
781 two-way ANOVA, p value \* $<0.05$ ; \*\*  $p<0.01$ , \*\*\*  $p<0.001$ .

782 **Figure 5. Vesicle associated astrovirus is infective in Caco-2 and MA104**  
783 **cells.** Large extracellular vesicles (LEV) and small extracellular vesicles (SEV) were  
784 purified by differential centrifugation and MagCapture™ exosome isolation kit PS  
785 from supernatants of Caco-2 cells infected with astrovirus (strain Yuc8). Samples  
786 were treated with medium (MEM); 0.1% Triton X-100; anti-Yuc8 (1:1500); or 0.1%  
787 Triton X-100 followed by anti-Yuc8 (1:1500) before addition to (A) Caco-2 or (B)

788 MA104 cells. Treated samples were let to adsorb for two hours, after which time  
789 unbound vesicles were washed and infection was left to proceed for 18 hours.  
790 Infected cells were detected by immuno-peroxidase staining (darker cells). Cells  
791 were observed in a Nikon Diaphot 300 microscope with 10X magnification and they  
792 are representative of three independent experiments done in three wells each. (C)  
793 Focus forming units (FFU) of each sample were counted in 3 wells of three  
794 independent experiments. Bars represent the viral focus forming units (FFU) in each  
795 sample  $\pm$  standard error of the mean. Samples where 0 FFU were observed (Triton  
796 X-100 and Triton X-100 plus anti-Yuc8 treatments) are not graphically represented.  
797 Statistical analysis was done with two-way ANOVA, p value \* $<0.05$ ; \*\*  $p<0.01$ , \*\*\*  
798  $p<0.001$ .

799

800 **Figure 6. The interaction of non-activated astrovirus Yuc8 with vesicles**  
801 **enhances their infectivity**

802 Large extracellular vesicles (LEV) and small extracellular vesicles (SEV) were  
803 purified by differential centrifugation and MagCapture™ exosome isolation kit PS  
804 from supernatants of non-infected Caco-2 cells. Purified vesicles were incubated  
805 with purified non-activated astrovirus Yuc8 particles for 1 hour at 37°C. Vesicle-virus  
806 mixtures were treated in 4 different conditions: medium (MEM); 0.1% Triton X-100;  
807 anti-Yuc8 (1:1500); and 0.1% Triton X-100 followed by anti-Yuc8 (1:1500). Treated  
808 fractions were then let to adsorb in (A) Caco-2 or (B) MA104 cells for two hours, after  
809 which time the unbound vesicles and viral particles were washed out. After 18 hpi  
810 infected cells were detected by immuno-peroxidase staining (darker cells). Images  
811 magnified with a 10X lens were observed in a Nikon Diaphot 300 microscope and  
812 they are representative of three independent experiments done in triplicate. (C)  
813 Infected cells observed in experimetns described in A and B were counted in three  
814 wells of three independent experiments and compared with the same amount of  
815 trypsin activated (Yuc8 Act) and non-activated (Yuc8 NA) astrovirus probed without  
816 pre-incubation with EV in Caco-2 and MA104 cells. Graphics shown the amount of  
817 infected cell in each sample expressed as focus forming units (FFU). Bars represent

818 the mean FFU  $\pm$  standard error of the mean. Statistical analysis was done with two-  
819 way ANOVA, p value \* $<0.05$ ; \*\*  $p<0.01$ , \*\*\*  $p<0.001$ .

820

821

822

823

824

825

826

827

828

829

830

831

832

833

834

835

836

837

838

839

840

841

842

843

844

845

846

847

848

849 **Figures**

850

851

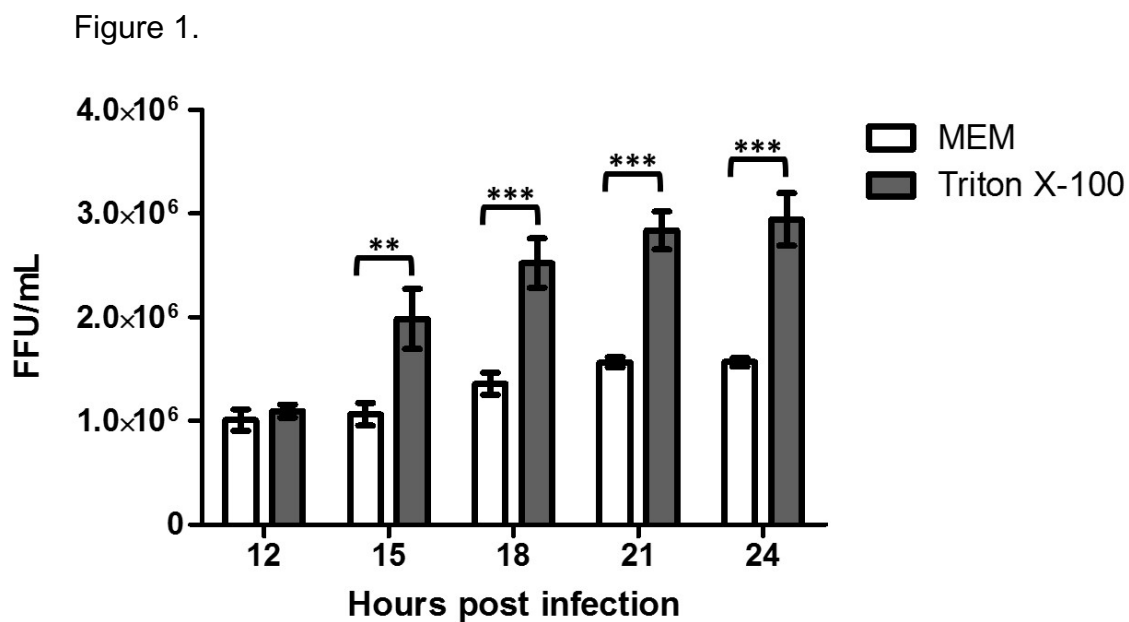

852

853

854

855

856

857

858

859

860

861

862

863

864

865

866

867

868

869 Figure 2.

870 A.

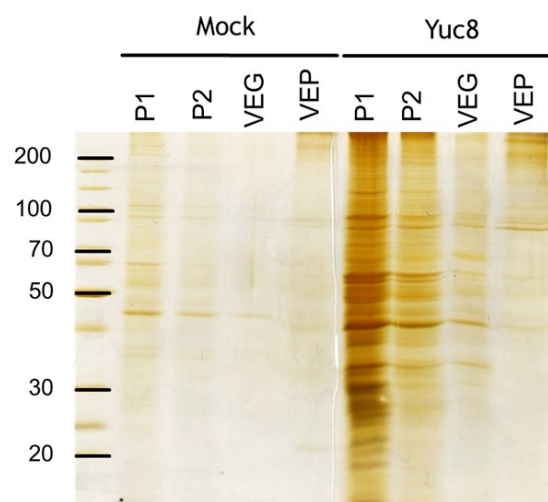

871

872 B.

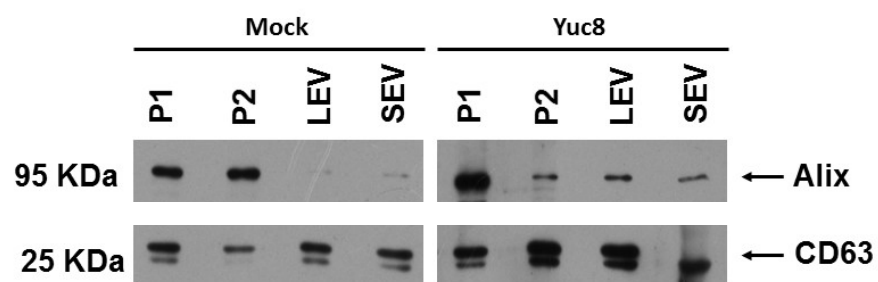

873

874

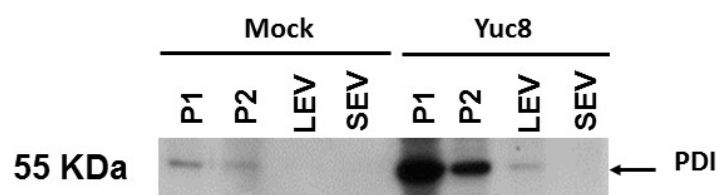

875

876

877

878

879

880

881

882 Figure 3.

883 A.

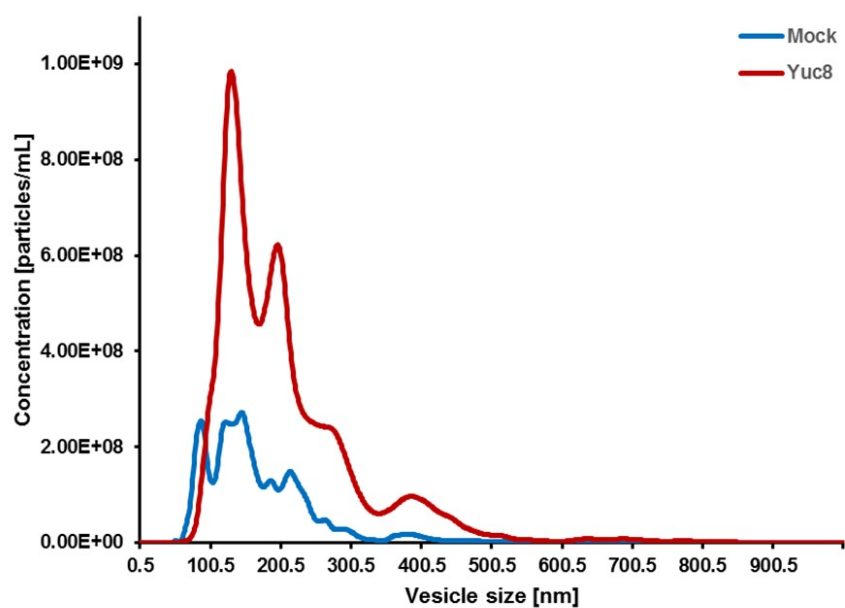

884

885 B.

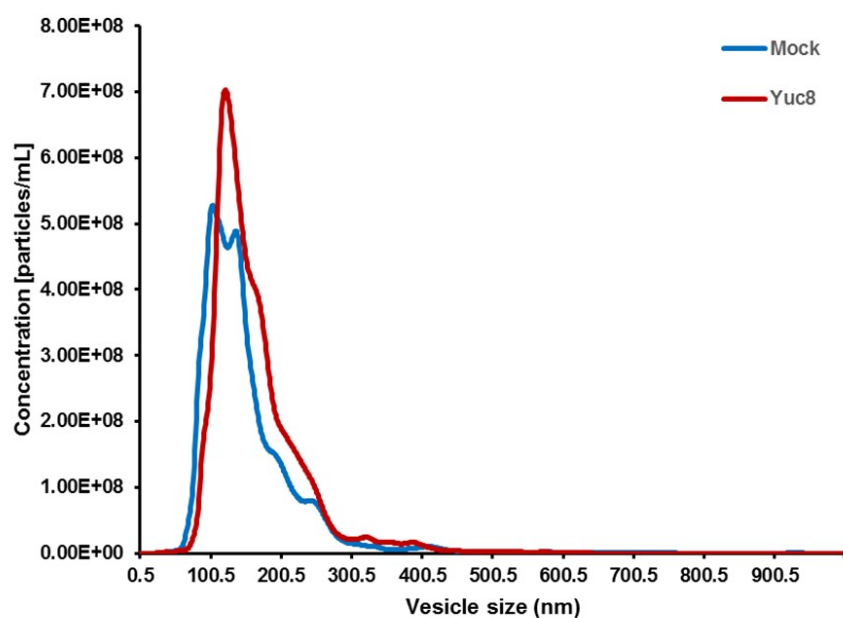

886

887

888

889

890



891 C.

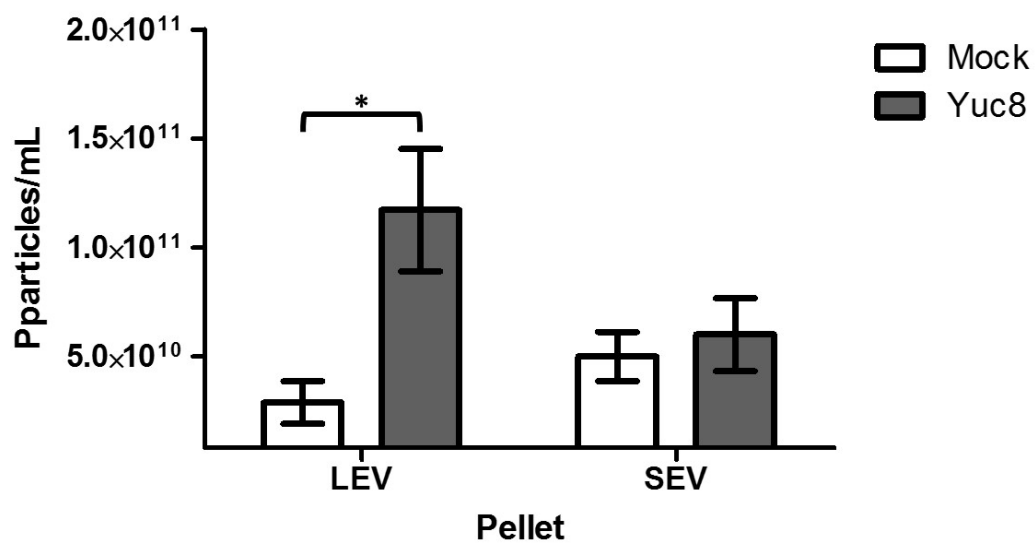

892

893

894

895

896

897

898

899

900

901

902

903

904

905

906

907

908

909

910

911

912 Figure 4.

913 A.

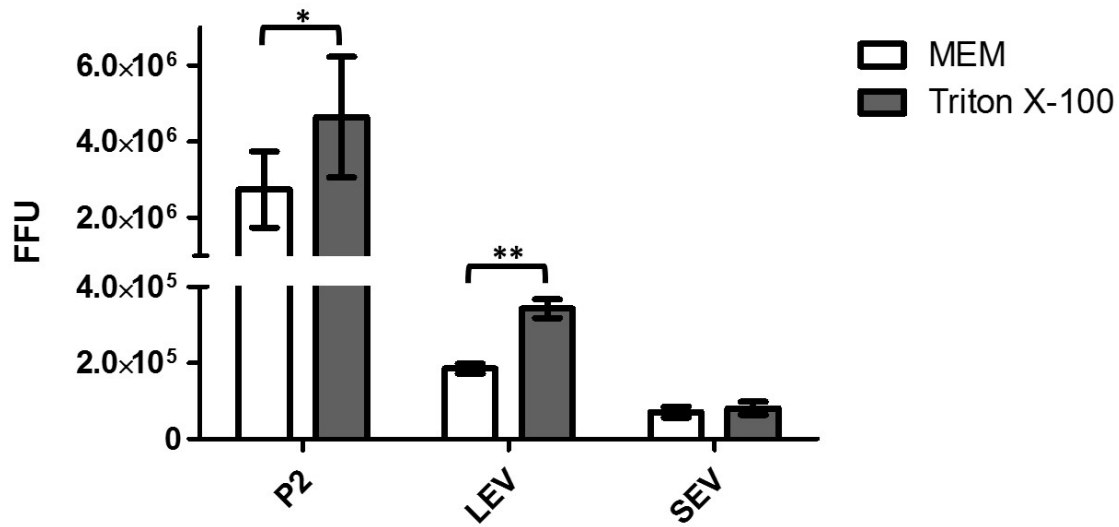

914

915 B.

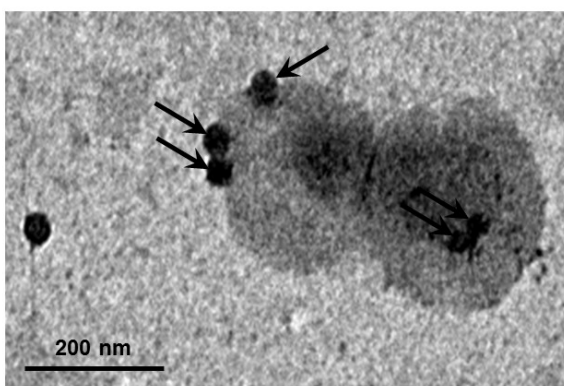

916

917

918

919

920

921

922

923

924

925 C.

926

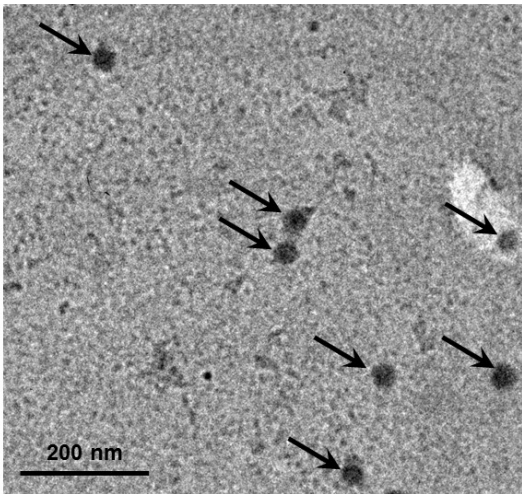

927

928

929

930

931

932 D.

933

934

935

936

937

938

939

940

941

942

943

944

945

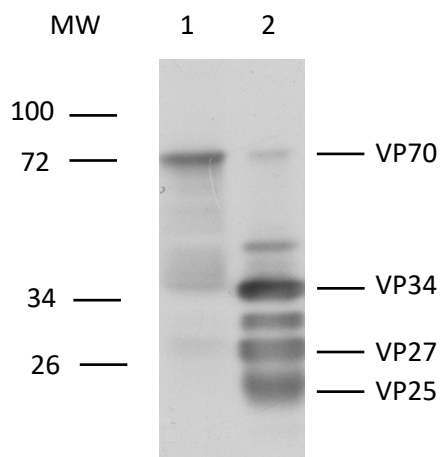

946 Figure 5.

947 A.

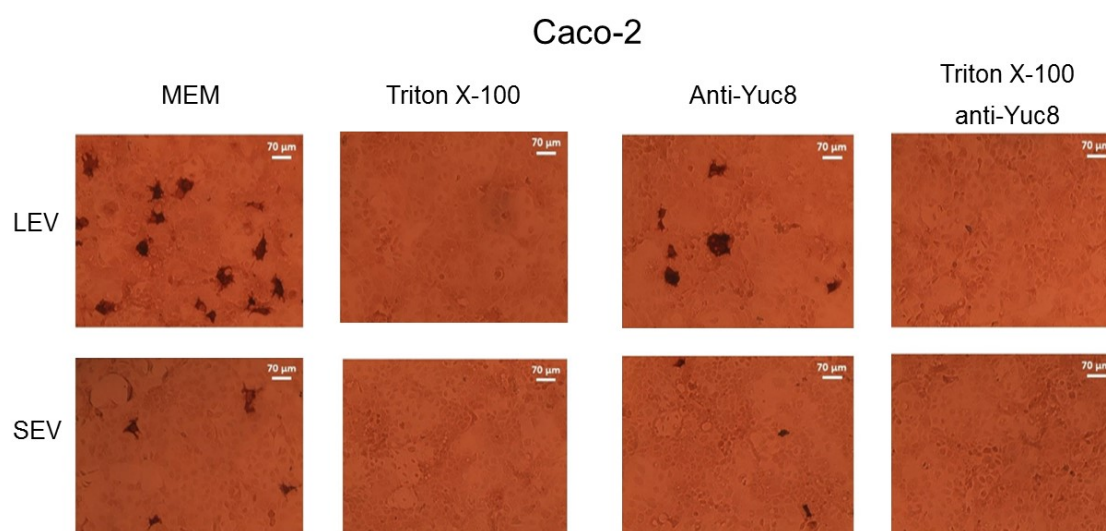

948

949 B.

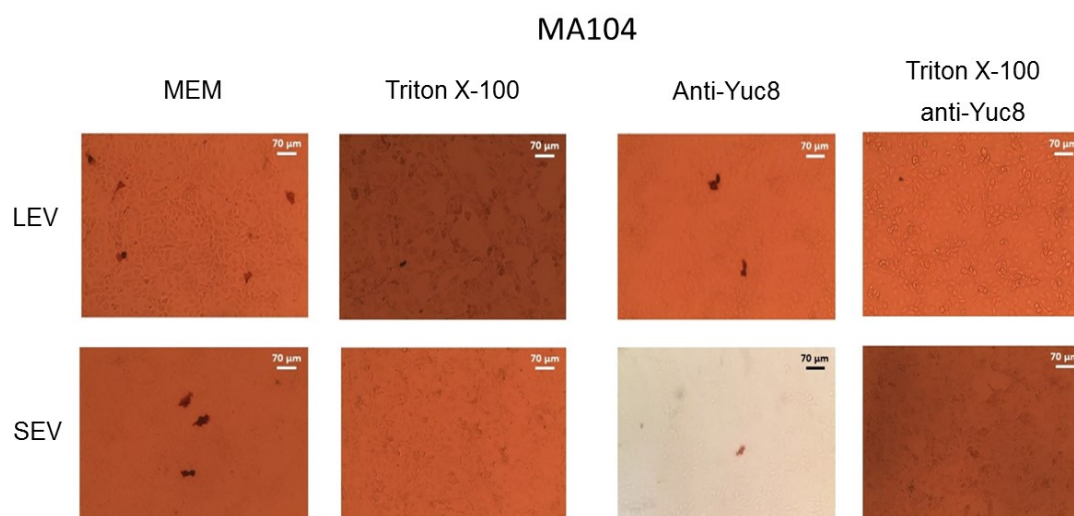

950

951

952

953

954

955

956

957

958 C.

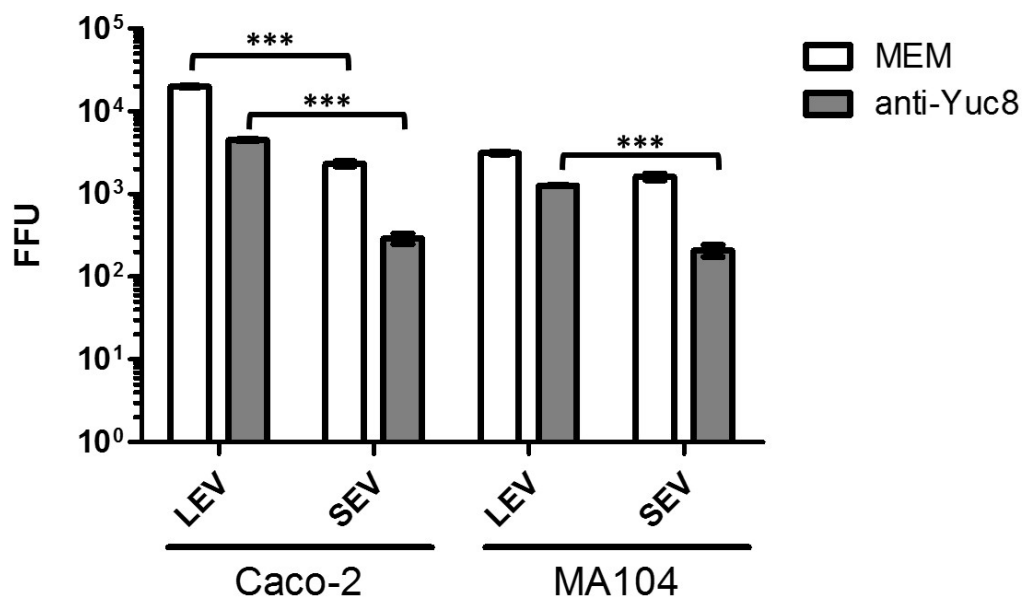

959

960

961

962

963

964

965

966

967

968

969

970

971

972

973

974

975

976 Figure 6.

977 A.

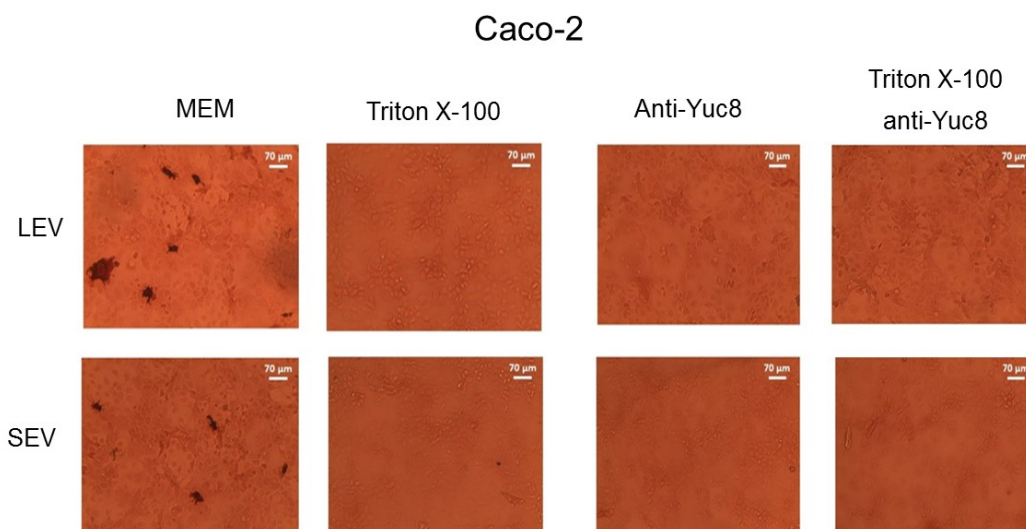

978

979 B.

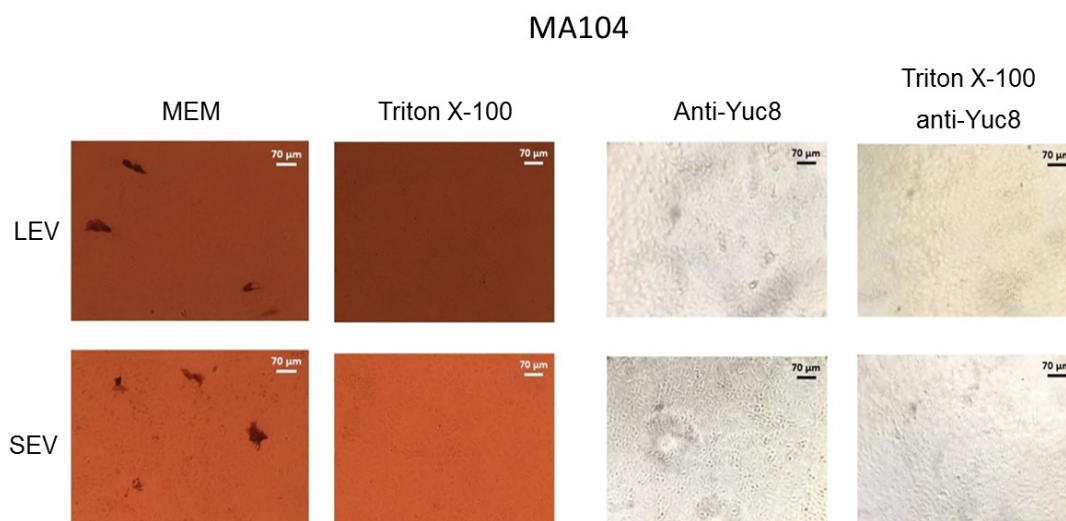

980

981

982

983

984

985

986

987

988 C.

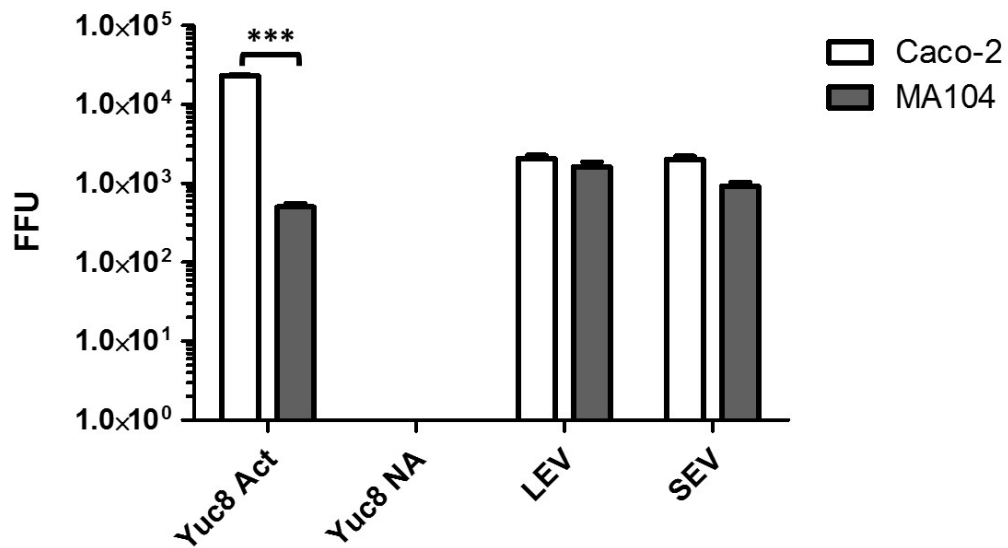

989

990

991

992

993

994

995

996

997

998
